# Supplementary material for: A phase II trial of autologous dendritic cell vaccination and radiochemotherapy following fluorescence-guided surgery in newly diagnosed glioblastoma patients
Source: Springer Nature journal article supplement (doi:10.1186/s12967-017-1202-z), 2017-05-12

## APPENDIX 1. Tumor location & Preoperative and postoperative MRI images.

The tumor location and the correspondent pre- and postoperative T1WI+gadolinium MRI images are described for each patient, according to the following schema:

PATIENT NO.

Brief description of tumor location.

MRI images:

Left: Preoperative MRI. T1WI + GADO

Right: Early postoperative MRI. T1WI + GADO

### PATIENT 1.

Right frontal lobe with mild corpus callosum involvement.

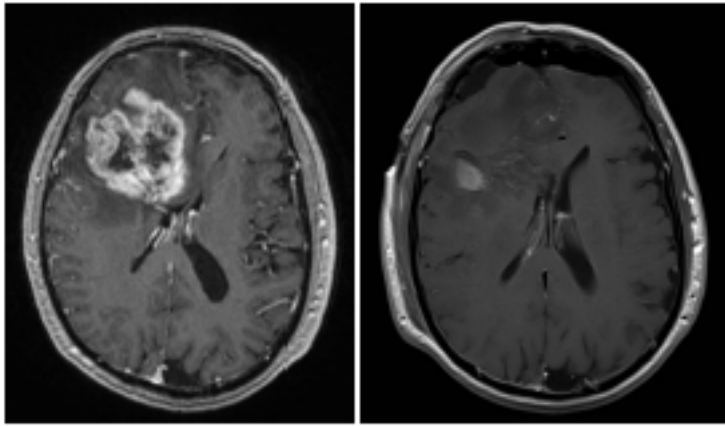

### PATIENT 2.

Left temporal lobe with subependymal involvement.

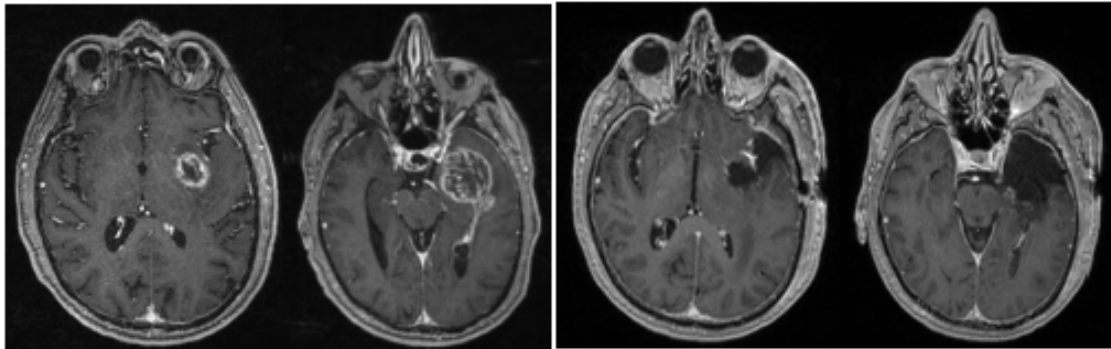

### PATIENT 3.

Left temporal lobe.

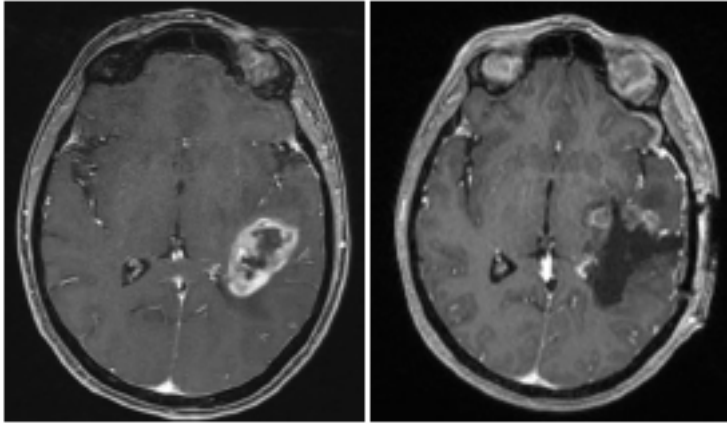

**PATIENT 4.**

Right frontal lobe.

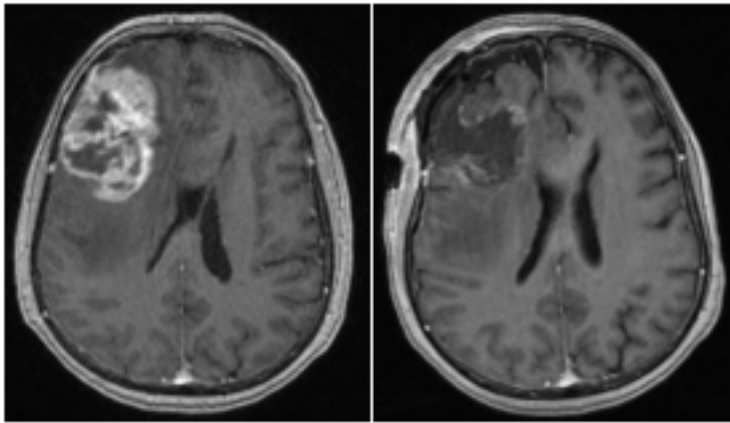

**PATIENT 5.**

Right frontal lobe.

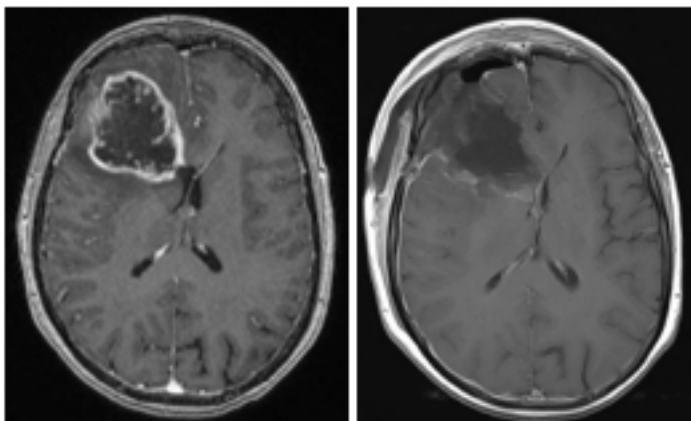

**PATIENT 6.**

Right temporal lobe.

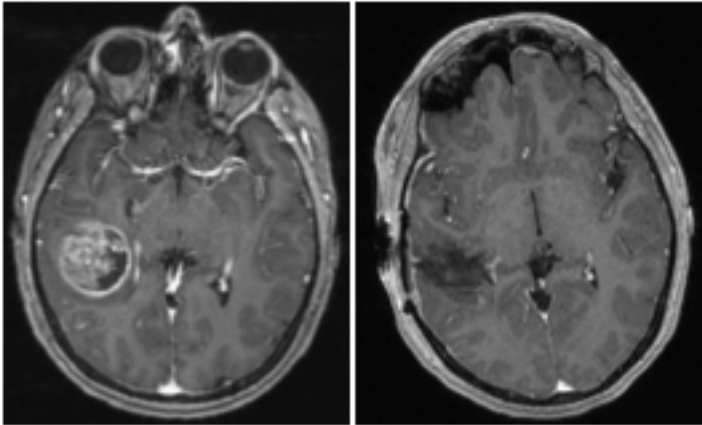

**PATIENT 7.**

Right medial temporal lobe with subependymal involvement.

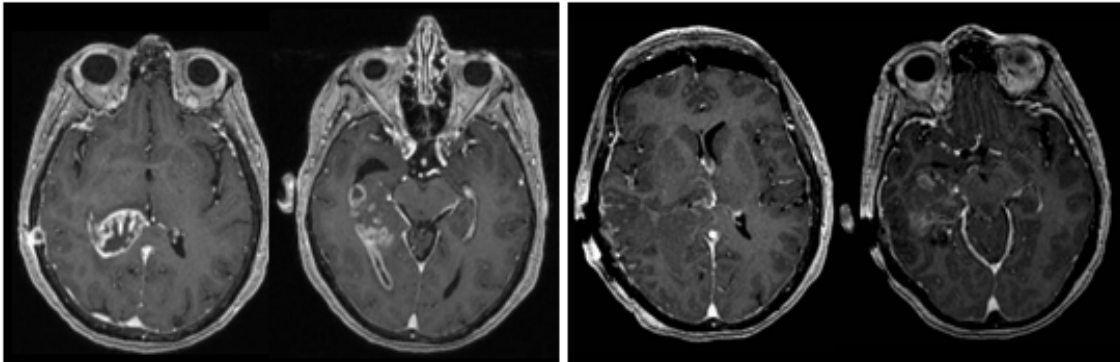

**PATIENT 8.**

Right temporal lobe.

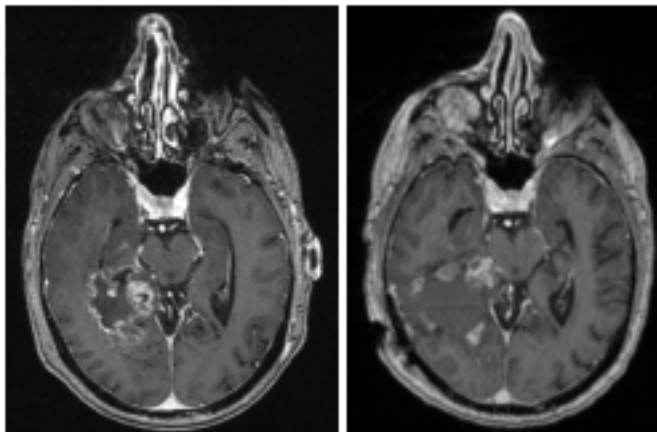

**PATIENT 9.**

Right frontal lobe with basal ganglia involvement.

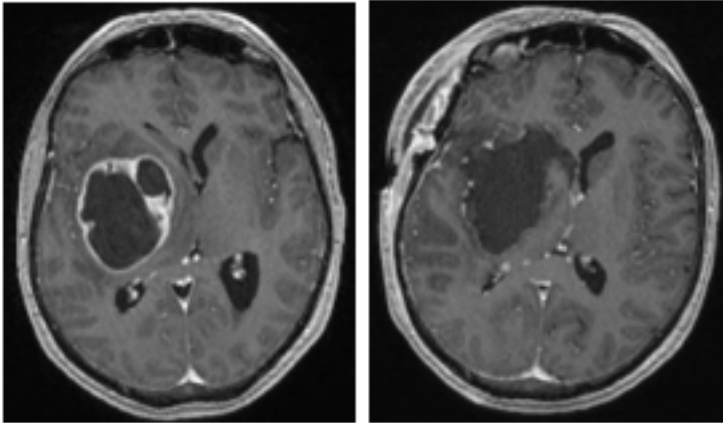

**PATIENT 10.**

Left temporo-occipital lobes.

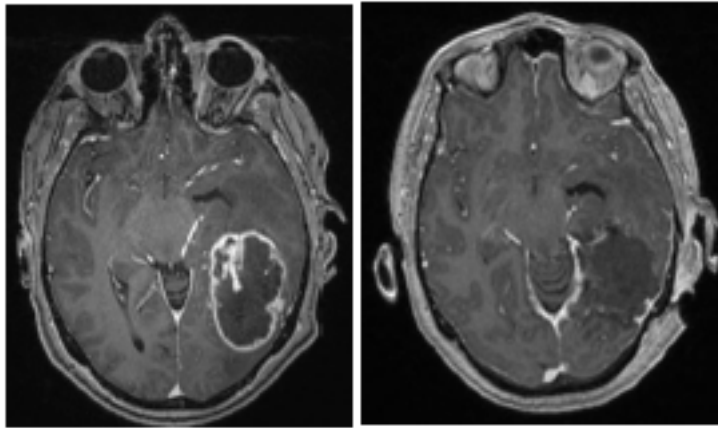

**PATIENT 11.**

Left parieto-occipital lobes.

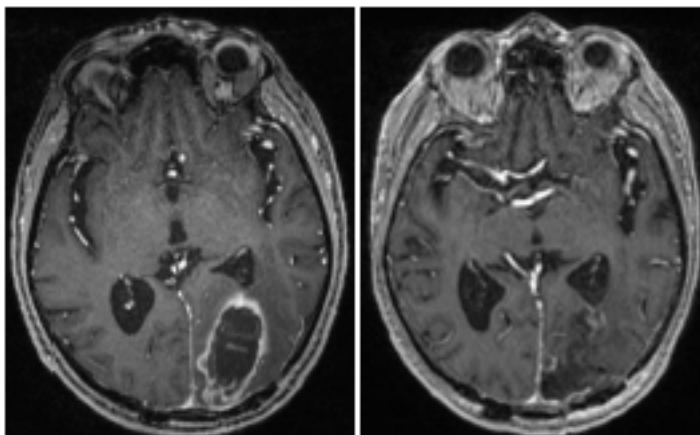

**PATIENT 12.**

Left temporal lobe.

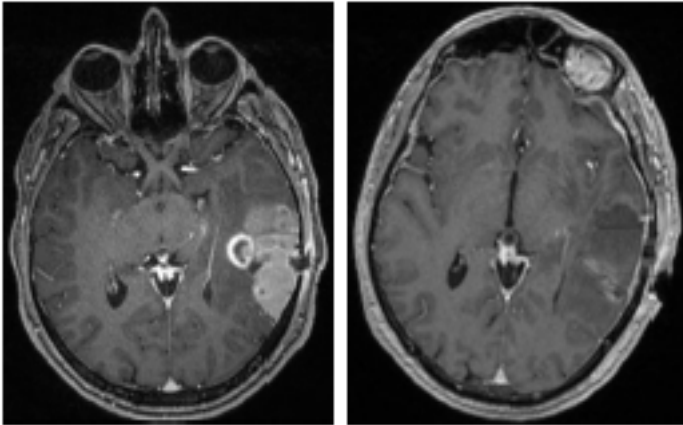

**PATIENT 13.**

Bilateral fronto-callosal location.

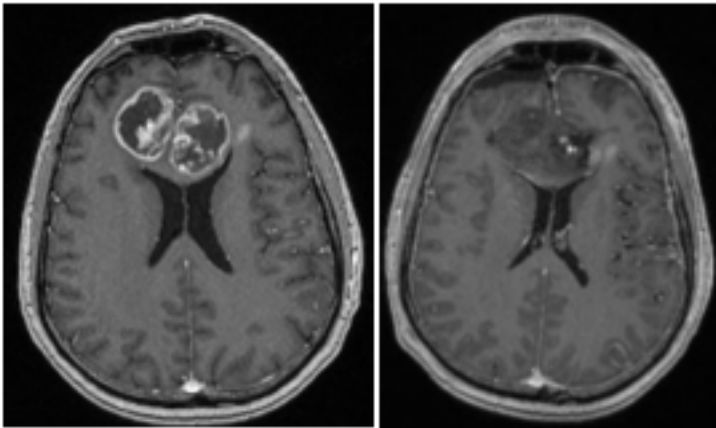

**PATIENT 14.**

Right parietal lobe.

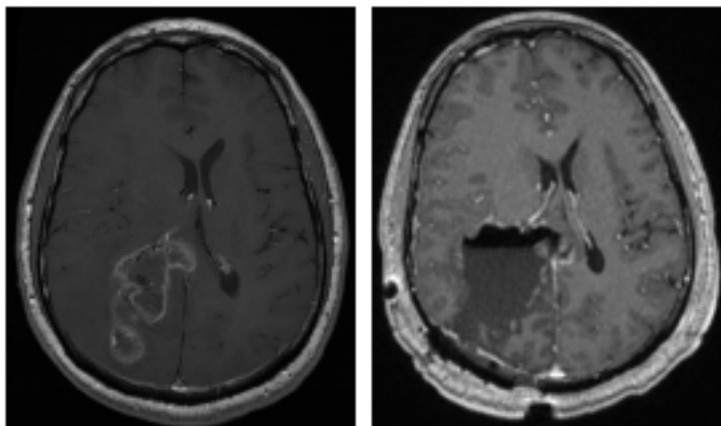

**PATIENT 15.**

Right frontal lobe.

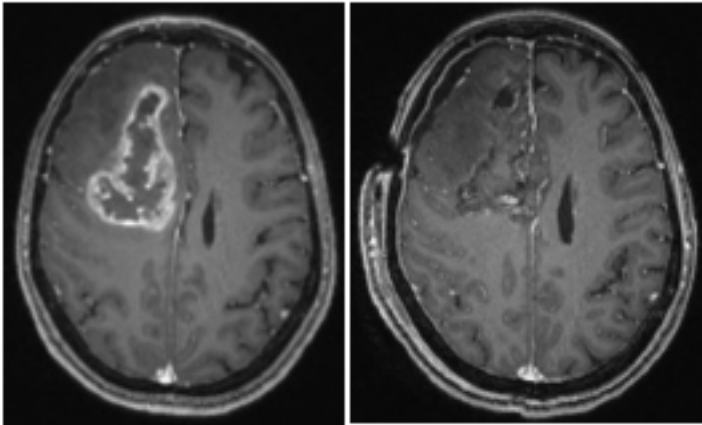

**PATIENT 16.**

Right temporo-parietal lobes.

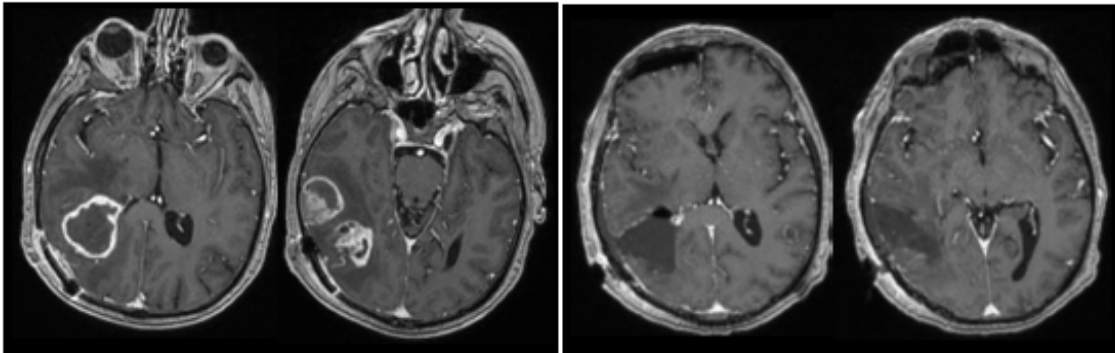

**PATIENT 17.**

Right parietal lobe.

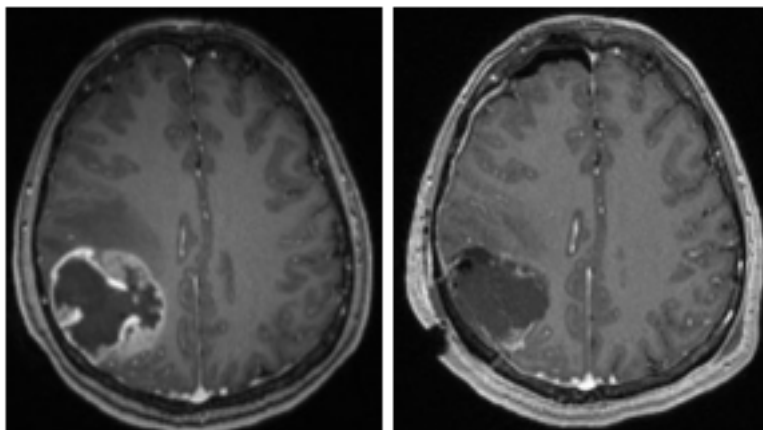

**PATIENT 18.**

Left medial frontoparietal lobes.

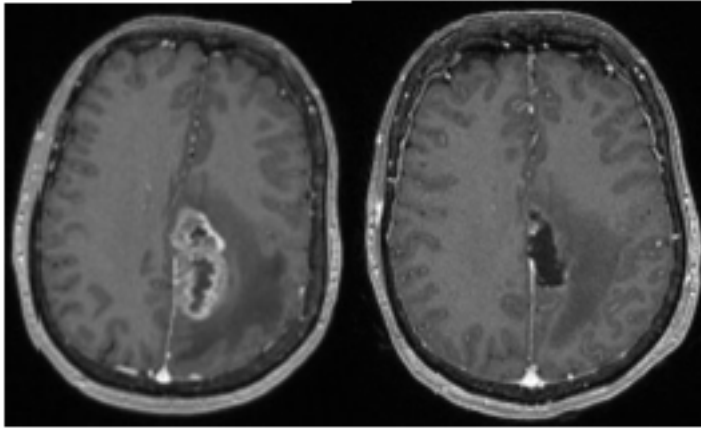

**PATIENT 19.**

Left temporo-occipital lobes.

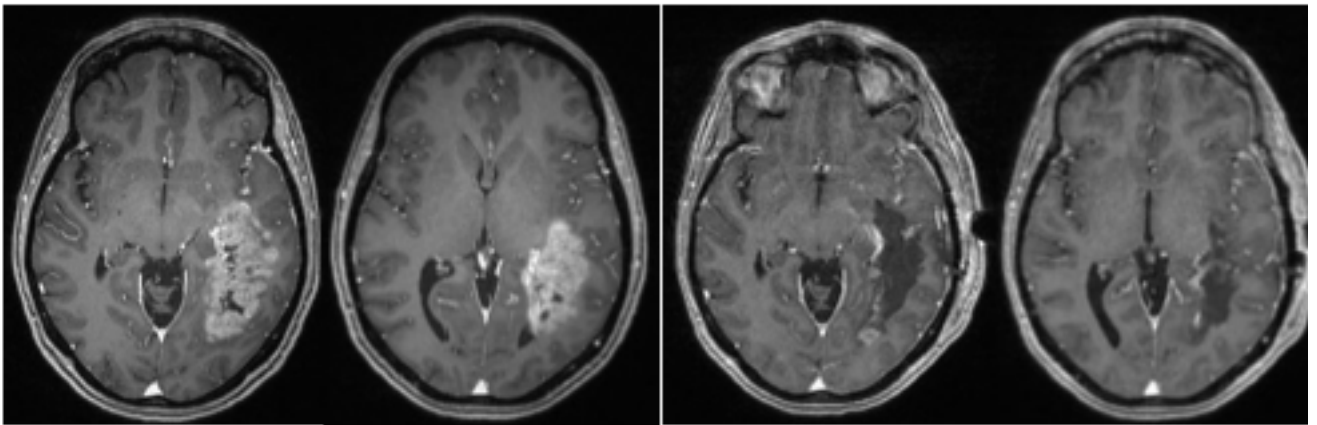

**PATIENT 20.**

Left parieto-occipital lobes.

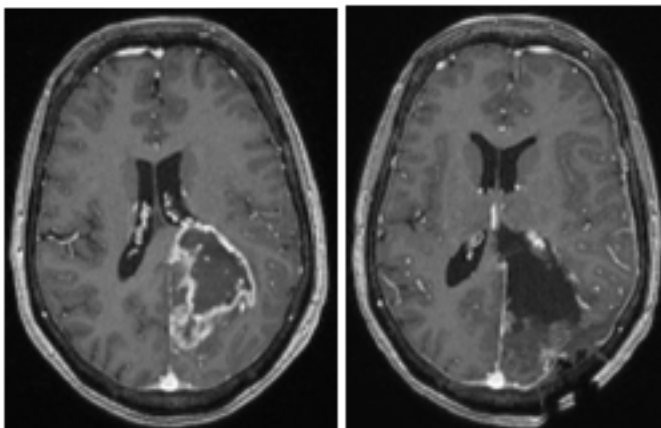

**PATIENT 21.**

Right frontal operculum área.

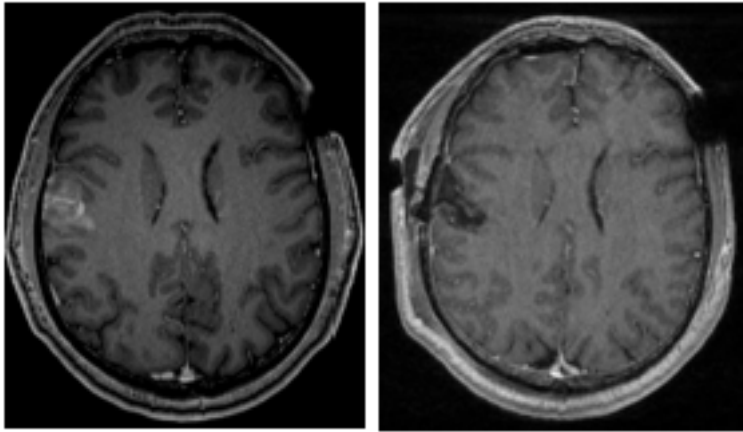

**PATIENT 22.**

Right fronto-temporal lobes.

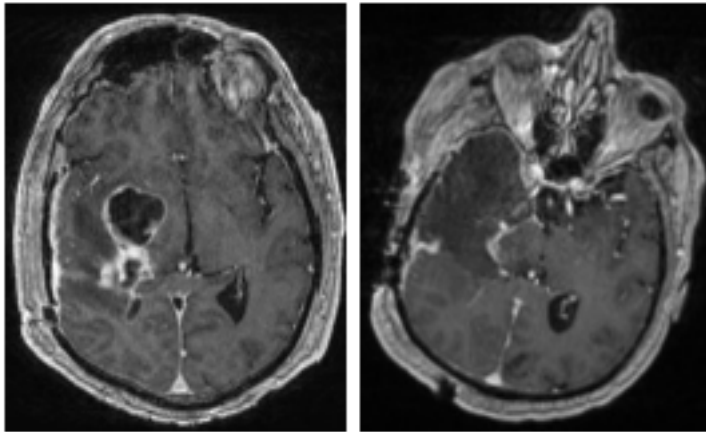

**PATIENT 23.**

Right temporo-parietal lobes.

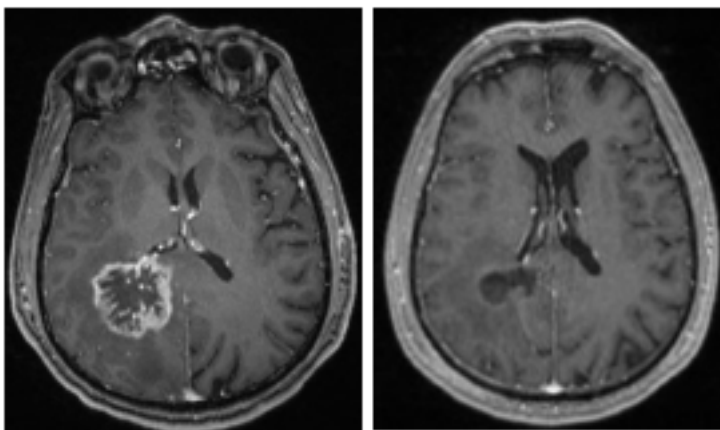

**PATIENT 24.**

*Patient not included - screening failure (residual tumor > 1cc).*



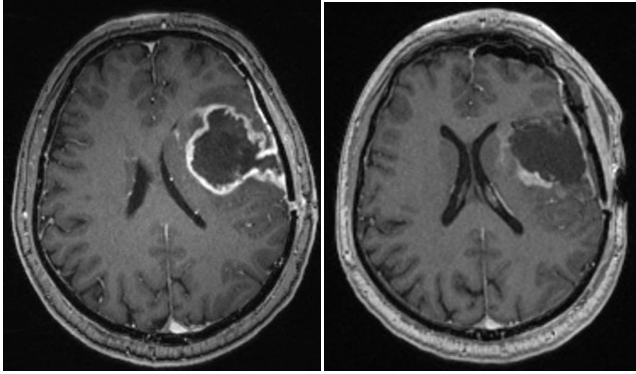

**PATIENT 25.**

Right frontal lobe.

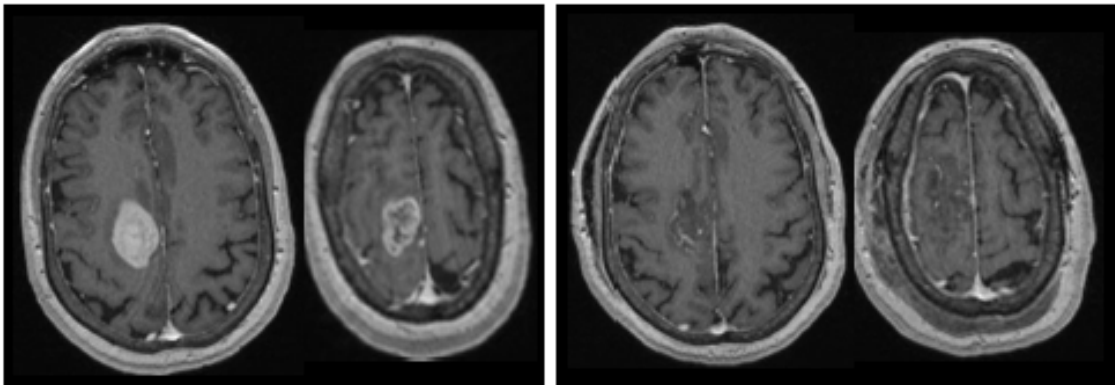

**PATIENT 26.**

Left temporal lobe.

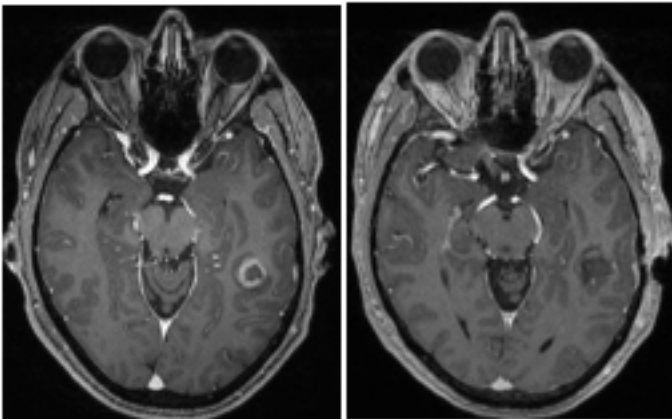

**PATIENT 27.**

Left temporal lobe.

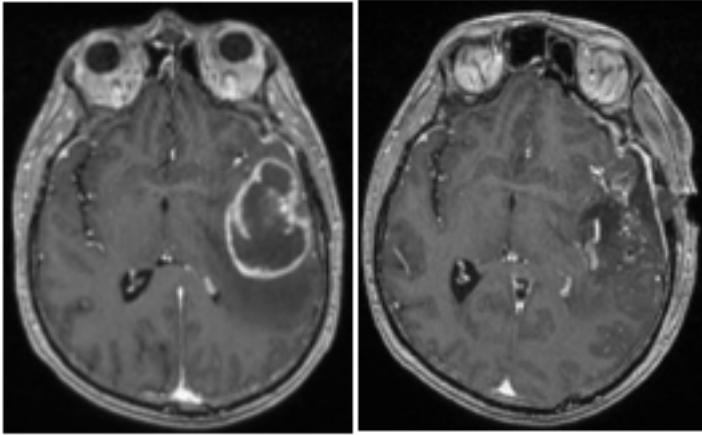

**PATIENT 28.**

Left fronto-parietal lobes.

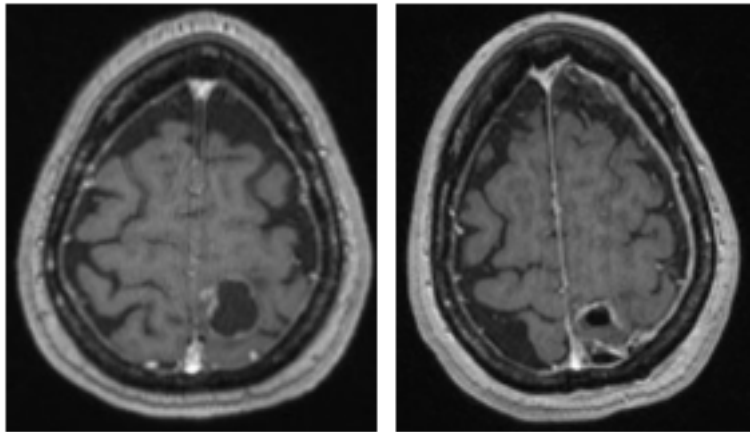

**PATIENT 29.**

Left parietal lobe.

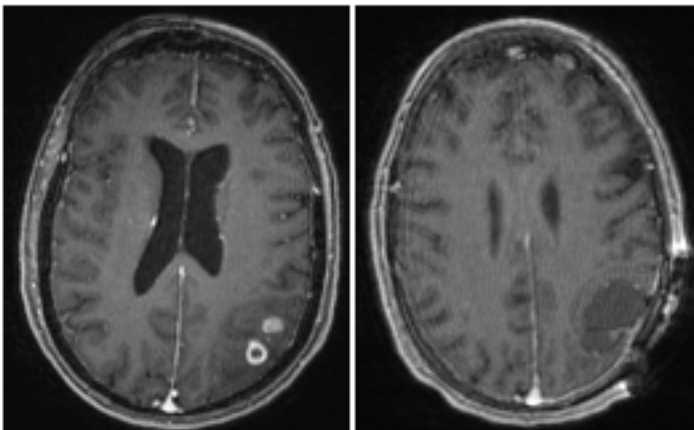

**PATIENT 30.**

Left frontal lobe.

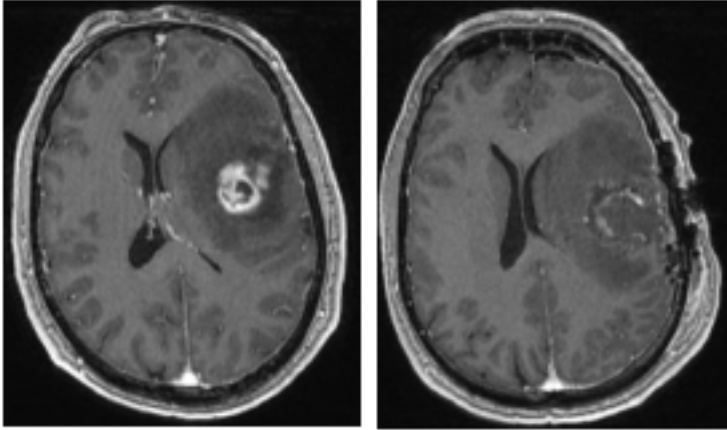

**PATIENT 31.**

Right frontal lobe with corpus callosum involvement.

*Pre-operative MRI not available.*

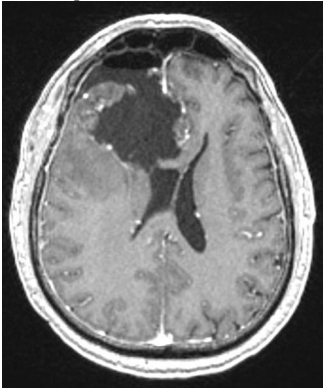

**PATIENT 32.**

Left parieto-occipital lobes.

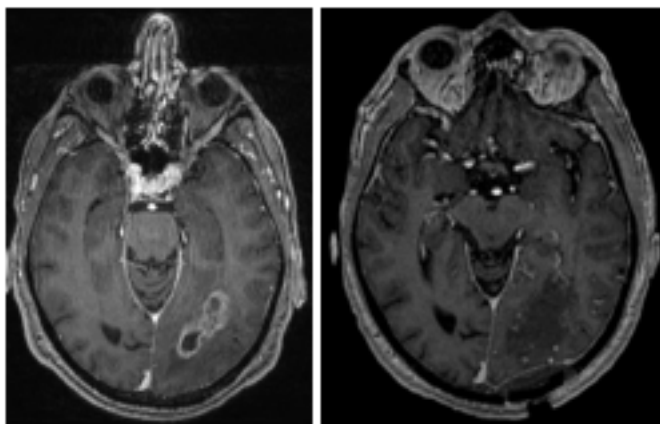

Supplement: MOESM1 [file 12281198]
